# Supplementary material
Source: PubMed Central journal article supplement (PMC2760437)
Supplement: NIHMS108119-supplement-Frisk_ESI.pdf [file NIHMS108119-supplement-Frisk_ESI.pdf]

# Supporting Information: Self-Assembled Peptide Monolayers as Toxin Sensing Mechanism within Arrayed Microchannels

Megan L. Frisk, William H. Tepp, Eric A. Johnson, and David J. Beebe

February 2, 2009

## 1 Experimental

### 1.1 Channel fabrication

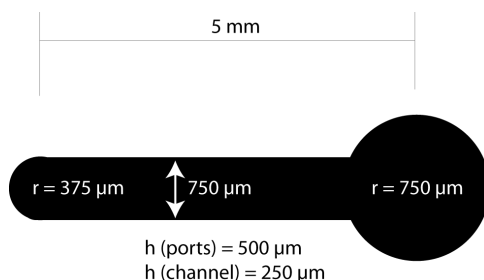

**Figure 1:** Microchannel dimensions

### 1.2 Recombinant SNAP-25

TOPO TA PCR cloning kit, Gateway pDest14 cloning kit, Gateway pDONOR 221 cloning kit, IPTG, NuPage SDS-PAGE gel system, S.N.A.P MINI prep kit and Probond protein purification system were purchased from Invitrogen. Oligers were purchased from IDT. Codon/plus BL21 competent cells were purchased from Stratagene.

*Expression and purification of tagged partial SNAP-25.* Positive recombinant pDest14SNAP25 DNA was transformed into codon/plus BL21 competent cells. One colony was inoculated into 2 mL LB medium containing 100  $\mu\text{g}/\text{mL}$  ampicillin and shaken overnight at 37°C. 500  $\mu\text{L}$  of the overnight culture was inoculated into 50 mL LB medium with 100  $\mu\text{g}/\text{mL}$  ampicillin and shaken at 37°C until OD/550 reached between 0.5-0.6. IPTG was then added to a final concentration of 1 mM to induce the expression for 3 h. Cell pellets were collected by centrifugation at 5000 rpm for 15 min. Resulting protein was purified by using Probond protein purification system as described by manufacturer. Purified recombinant SNAP-25 was verified by SDS-PAGE.

### 1.3 SNAPtide<sup>®</sup> FRET assay

Lyophilized SNAPtide<sup>®</sup> (#521, FITC/DABCYL) was purchased from List Biological Laboratories (Campbell, CA) and immediately dissolved in DMSO to make a 2.5 mM stock solution. For all

FRET assays with BoNT/A, stock solution was diluted to 7.75  $\mu\text{M}$  in the assay buffer (20 mM HEPES with 0.1% Tween-20, pH 8.0). Toxin incubation with the SNAPtide<sup>®</sup> took place for 3 h at 35°C.

## 1.4 Data processing

To remove experimental error from all data sets, the sample median was used as a robust estimator.<sup>1</sup> A sample median ( $T$ ) was found for all intensity values within a particular data set from which a median of all absolute deviations (MAD) was determined as a scale estimator ( $S$ ). Data points with a  $z$  score greater than 2.5 were removed from sample sets (equation 1):

$$z = \frac{x_i - T}{S} \quad (1)$$

## 2 Relevant data

### 2.1 BoNT/A

The BoNT/A holotoxin and light chain were incubated with the FRET SNAPtide<sup>®</sup> in both buffer and soup to verify toxin activity in the latter medium. As shown in 2, toxin activity was, in fact, heightened in soup ( $*P < 0.01$ ,  $**P < 0.001$ ). The same concentration of holotoxin (500 ng/mL) in buffer did not produce a distinguishable signal as compared to the respective control (NS). While previously undetectable using the SAM-based assay, 2  $\mu\text{g}/\text{mL}$  ALC was detected using the SNAPtide<sup>®</sup>. The 20-fold greater activity of the 50 kDa light chain as compared to the 150 kDa holotoxin is expected with this FRET substrate.<sup>2</sup>

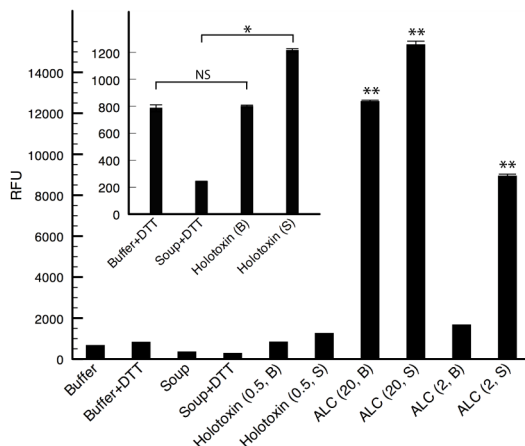

**Figure 2:** SNAPtide<sup>®</sup> shows increase in toxin activity in soup as compared to buffer for both the holotoxin (500 ng/mL) and ALC (2 and 20  $\mu\text{g}/\text{mL}$ ).

## 3 References

1. P. Rousseeuw, in *Handbook of Statistical Methods for Engineers and Scientists*, ed. H. Wadsworth, McGraw-Hill Publishing Company, New York, 1990, ch. Robust Estimation and Identifying Outliers, pp. 16.2-16.5.

2. T. Christian, N. Shine, L. Eaton and K. Crawford, List Biological Laboratories, Inc. Poster presented at 5th International Conference on Basic and Therapeutic Aspects of Botulinum and Tetanus Toxins, 2005.
